# Supplementary material
Source: PubMed Central journal article supplement (PMC4214534)

Supplemental Figure 1

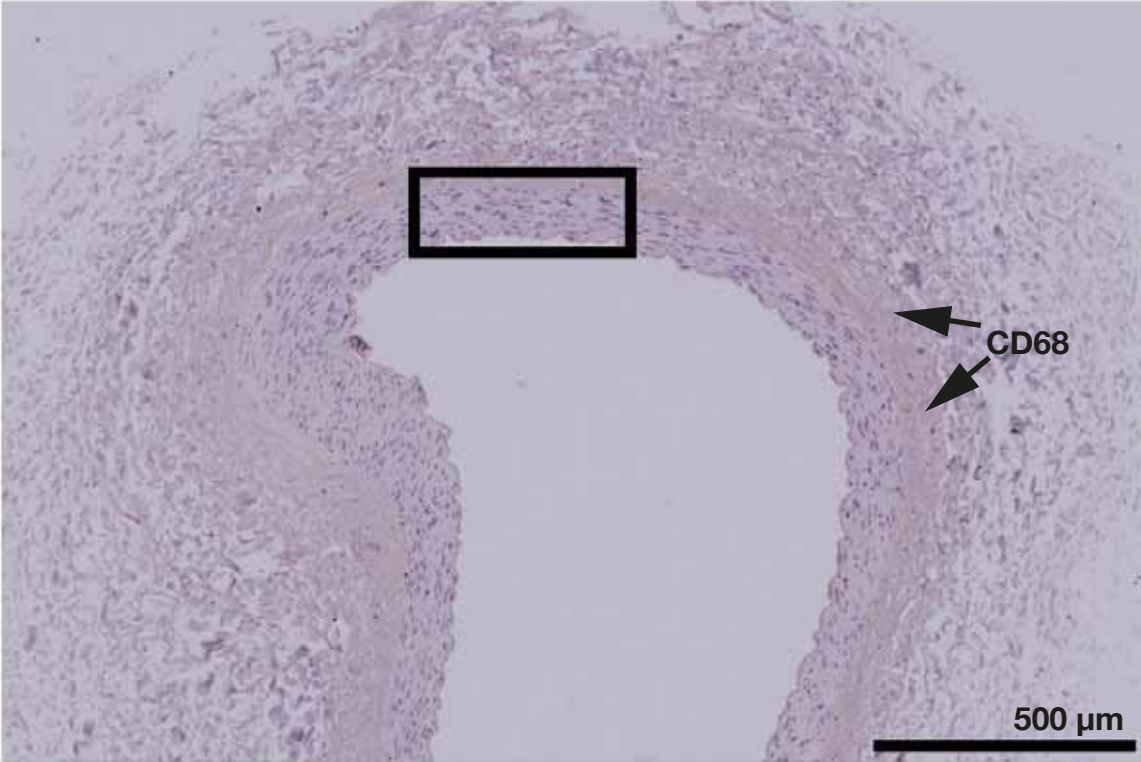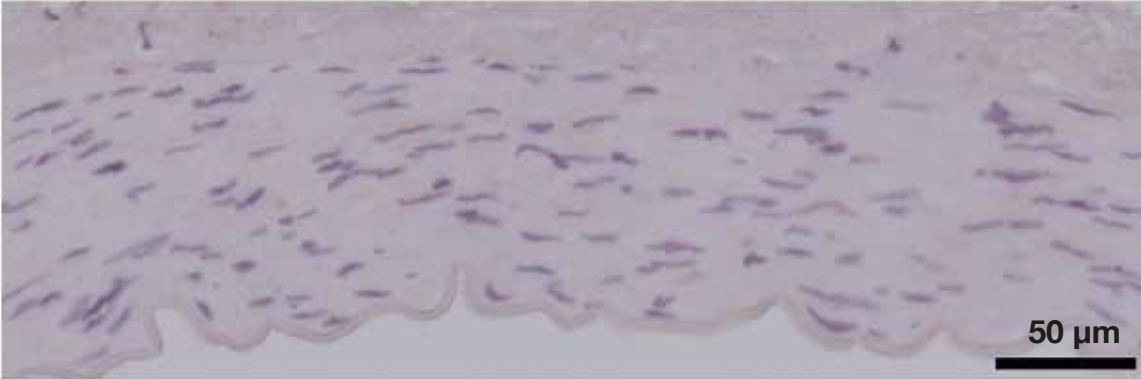

Supplement: ASN.2013111212_ASN2013111212SupplementaryData1.pdf [file ASN.2013111212_ASN2013111212SupplementaryData1.pdf]

## Supplemental Figure 2

(A)

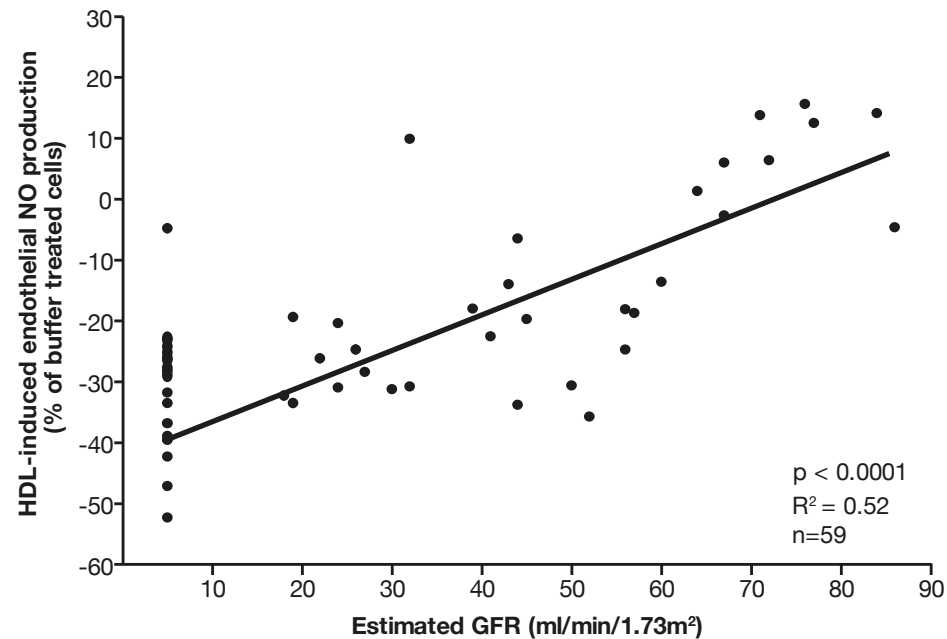

(B)

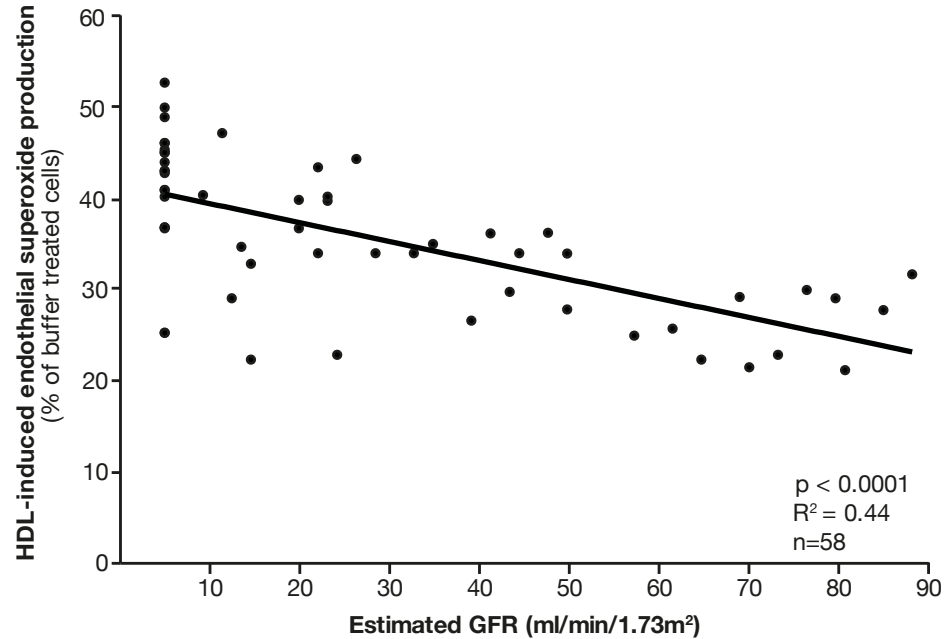

Supplement: ASN.2013111212_ASN2013111212SupplementaryData2.pdf [file ASN.2013111212_ASN2013111212SupplementaryData2.pdf]
